# Supplementary material
Source: publisher site journal article supplement (https://www.spandidos-publications.com/5694/downloadSupplementary)
Supplement: Supplementary file 1 [file downloadSupplementary]

Figure S1. Reverse transcription-quantitative PCR results for circ\_0004365 in TE11 5-FU, TE11 DTX and TE11 cells.

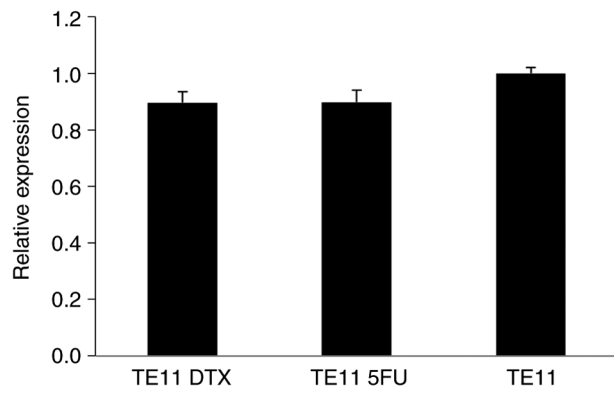

Figure S2. Relative expression of circ\_0004365 in ESCC tissues measured via reverse transcription-quantitative PCR. (A) Relative expression of circ\_0004365 from ESCC tumor and adjacent non-tumor tissues before NAC. (B) Relative expression of circ\_0004365 from ESCC tumor tissues and adjacent non-tumor tissues after NAC. (C) Relative expression of circ\_0004365 from matched ESCC tumor tissues before and after NAC compared using the paired-samples t-test. N, nontumor tissues; T, tumor tissues; ESCC, esophageal squamous cell carcinoma; NAC, neoadjuvant chemotherapy.

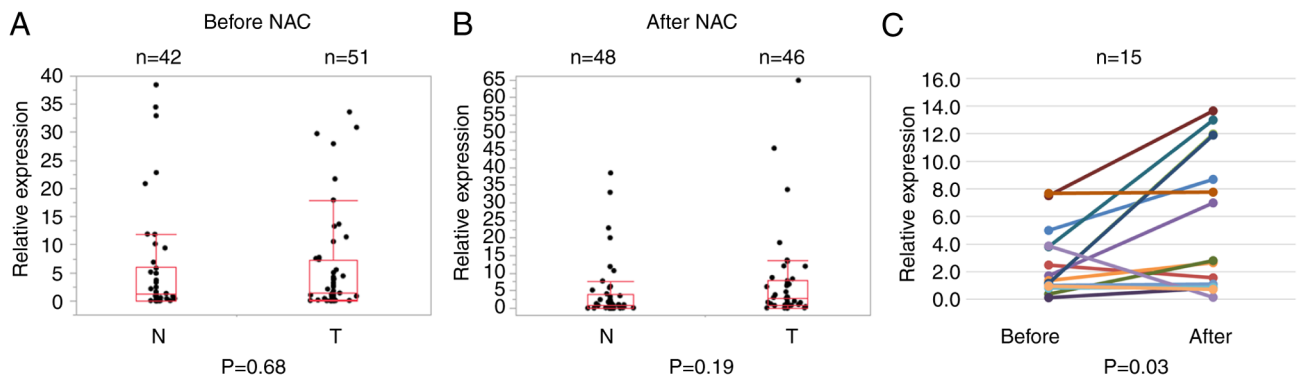

Figure S3. (A) CircInteractome predicting the binding sites between hsa\_circ\_0004365 and miR. (B) Sequences of the binding sites between hsa\_circ\_0004365 and miR-503. circRNA, circular RNA; miRNA, microRNA.

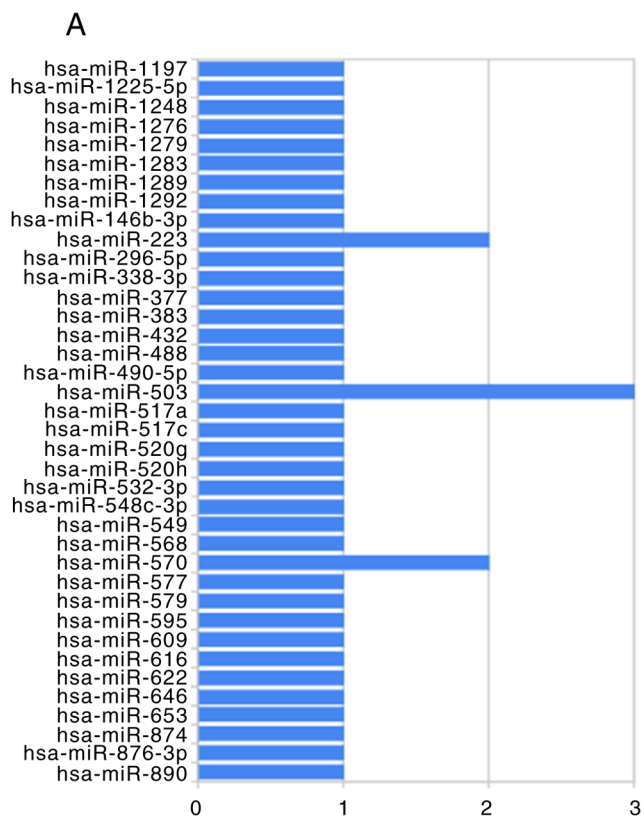

**B**

| hsa_circ_0004365 (5'-3') |                                                             |
|--------------------------|-------------------------------------------------------------|
|                          |                                                             |
| hsa-miR-503 (3'-5')      |                                                             |
| 1                        | UUCAUGGGGACAGAUGCUGCUAU<br>     <br>GACGUCUUGACAAGGGCGACGAU |
| 2                        | UGUGGAUCGAGUGAACGCUGCUG<br>     <br>GACGUCUUGACAAGGGCGACGAU |
| 3                        | UUCAUGGGGACAGAUGCUGCUAU<br>     <br>GACGUCUUGACAAGGGCGACGAU |
